# Supplementary material for: Cancer Stem Cell Gene Variants Predict Disease Recurrence in Patients Treated with Radical Prostatectomy for Prostate Cancer
Source: PubMed Central journal article supplement — Int J Med Sci. 2017 Sep 30;14(12):1301–6. doi: 10.7150/ijms.21428 (PMC5666565; doi:10.7150/ijms.21428), 2017-09-30
Supplement: ijmsv14p1301s1.pdf [file ijmsv14p1301s1.pdf]

**Table S1.** Clinicopathologic characteristics of the study population

| Characteristics               | n (%) <sup>*</sup> | BCR         |                |                       |
|-------------------------------|--------------------|-------------|----------------|-----------------------|
|                               |                    | n of events | Median, months | <i>P</i> <sup>‡</sup> |
| All patients                  | 320                | 116         | 53             |                       |
| Age at diagnosis, years       |                    |             |                |                       |
| ≤65                           | 141 (44.6)         | 51          | 46             | 0.291                 |
| >65                           | 175 (55.4)         | 63          | 64             |                       |
| PSA at diagnosis, ng/mL       |                    |             |                |                       |
| ≤10                           | 132 (42.7)         | 28          | NR             | <0.001                |
| >10                           | 177 (57.3)         | 83          | 30             |                       |
| Pathologic Gleason score      |                    |             |                |                       |
| 2–6                           | 122 (39.1)         | 33          | NR             | <0.001                |
| 7–10                          | 190 (60.9)         | 79          | 30             |                       |
| Pathologic stage <sup>†</sup> |                    |             |                |                       |
| Localized                     | 206 (65.6)         | 46          | NR             | <0.001                |
| Locally advanced              | 108 (34.4)         | 65          | 10             |                       |
| Surgical margin               |                    |             |                |                       |
| Negative                      | 196 (70.5)         | 51          | NR             | <0.001                |
| Positive                      | 82 (29.5)          | 47          | 22             |                       |
| Lymph node metastasis         |                    |             |                |                       |
| Negative                      | 290 (93.2)         | 92          | 71             | <0.001                |
| Positive                      | 21 (6.8)           | 19          | 2              |                       |

Abbreviations: BCR, biochemical recurrence; PSA, prostate-specific antigen; NR, the median survival was not reached.

<sup>\*</sup>Column subtotals do not sum to 320 due to missing data.

<sup>†</sup>Tumor-node-metastasis staging by American Joint Committee on Cancer in 1997: Localized: T1/T2; Locally advanced: T3/T4.

<sup>‡</sup>*P* values were calculated using the log-rank test and *P* < 0.05 are in boldface.

**Table S2.** Regulatory annotation of variants linked with rs2394882

| SNP ID    | Chromosome | Position | LD (r <sup>2</sup> ) | Reference allele | Alternate allele | ASN frequency | Variant type | Promoter histone marks                                                                                                        | Enhancer histone marks | DNase | Proteins bound                                                                                        | Motifs changed                                                                              |
|-----------|------------|----------|----------------------|------------------|------------------|---------------|--------------|-------------------------------------------------------------------------------------------------------------------------------|------------------------|-------|-------------------------------------------------------------------------------------------------------|---------------------------------------------------------------------------------------------|
| rs2022084 | 6          | 31149276 | 0.8                  | A                | G                | 0.63          | intronic     |                                                                                                                               |                        |       |                                                                                                       | Nkx2                                                                                        |
| rs3130498 | 6          | 31149842 | 0.8                  | T                | C                | 0.63          | intronic     |                                                                                                                               | LIV                    |       |                                                                                                       | Lmo2-complex, Mtf1, Myf, NRSF, TCF12, ZEB1, Zbtb3                                           |
| rs130078  | 6          | 31150788 | 0.8                  | C                | G                | 0.63          | synonymous   |                                                                                                                               | ESDR, IPSC, GI         |       |                                                                                                       | Myf, p53                                                                                    |
| rs3130500 | 6          | 31152199 | 0.81                 | T                | A                | 0.63          | intronic     |                                                                                                                               |                        |       |                                                                                                       | COMP1, HNF4, RXRA                                                                           |
| rs2240059 | 6          | 31152837 | 0.84                 | C                | T                | 0.63          | intronic     |                                                                                                                               | ESDR                   |       |                                                                                                       | AP-2, ERalpha-a, HNF4, NRSF, Sin3                                                           |
| rs3130450 | 6          | 31153736 | 0.82                 | C                | T                | 0.63          | intronic     |                                                                                                                               |                        |       |                                                                                                       | Ak-20, Znf143                                                                               |
| rs3130452 | 6          | 31155536 | 0.81                 | A                | G                | 0.62          | intronic     |                                                                                                                               |                        |       |                                                                                                       | Irf, SP1, TATA, ZBRK1                                                                       |
| rs3095239 | 6          | 31159013 | 0.8                  | A                | G                | 0.54          | 5'-UTR       | ESC, ESDR, LNG, IPSC, FAT, STRM, BRST, BLD, MUS, BRN, SKIN, VAS, LIV, GI, ADRL, HRT, KID, PANC, PLCNT, THYM, OVRY, CRVX, BONE | SPLN                   |       | ESC, ESDR, ESDR, ESC, LNG, BRST, BLD, BLD, SKIN, SKIN, HRT, LNG, THYM, BLD, CRVX, MUS, VAS, BLD, SKIN |                                                                                             |
| rs3094187 | 6          | 31159167 | 0.81                 | C                | T                | 0.54          | 5'-UTR       | ESC, ESDR, LNG, IPSC, FAT, STRM, BRST, BLD, MUS, BRN, SKIN, VAS, LIV, GI, ADRL, HRT, KID, PLCNT, THYM, OVRY, PANC, CRVX, BONE | HRT, LNG, SPLN         |       | ESC, ESDR, ESC, BRST, SKIN, HRT, MUS, MUS, CRVX, LIV, VAS, BLD                                        |                                                                                             |
| rs3130934 | 6          | 31160775 | 0.99                 | A                | C                | 0.59          | intronic     | BLD                                                                                                                           | BLD                    |       |                                                                                                       | Fox, Foxa, Foxd3, Foxf1, Foxi1, Foxj1, Foxj2, Foxl1, Foxp1, Foxq1, Irf, RREB-1, Sox, Zfp105 |

|                  |   |          |      |   |     |      |            |                    |                                                       |         |                                 |                                                 |
|------------------|---|----------|------|---|-----|------|------------|--------------------|-------------------------------------------------------|---------|---------------------------------|-------------------------------------------------|
| rs2073721        | 6 | 31161839 | 0.84 | A | G   | 0.63 | missense   |                    | IPSC, ESC,<br>SKIN, BLD                               | IPSC    | POL2                            | EBF,Irf,MZF1::1-4,NF-kappaB,Nkx2,STAT SREBP     |
| rs2073723        | 6 | 31162301 | 0.84 | T | C   | 0.63 | intronic   |                    | ESC, IPSC,<br>SKIN, BLD,<br>CRVX                      | ESC     |                                 |                                                 |
| rs1065461        | 6 | 31162725 | 0.84 | T | C,G | 0.63 | 3'-UTR     |                    |                                                       | ESC     | POL2,POL24H8                    |                                                 |
| rs3132528        | 6 | 31163792 | 0.84 | C | T   | 0.63 | 3'-UTR     | BLD                | MUS, LNG,<br>CRVX, BRST                               | CRVX    |                                 | AIRE,ATF3,CACD,Rad21,SP2 Myf                    |
| rs1061118        | 6 | 31164637 | 1    | G | A   | 0.59 | synonymous |                    |                                                       |         |                                 |                                                 |
| <b>rs2394882</b> | 6 | 31164872 | 1    | A | C   | 0.59 | intronic   | BLD                | IPSC, BLD                                             |         |                                 | DEC,E2A,Irf,Nanog,Pou5f1,TAL1                   |
| rs2106074        | 6 | 31165732 | 0.99 | G | A   | 0.59 | intronic   |                    | ESDR, ESC,<br>IPSC, BLD                               |         |                                 |                                                 |
| rs3130932        | 6 | 31166166 | 0.99 | C | A   | 0.59 | 5'-UTR     | BLD                | ESC, IPSC                                             | BLD,MUS |                                 | Hand1                                           |
| rs3130929        | 6 | 31167430 | 0.83 | T | C   | 0.63 | intronic   | ESC, IPSC          | ESC                                                   |         |                                 | Egr-1,Mtf1,Znf143                               |
| rs9263804        | 6 | 31167929 | 0.83 | C | T   | 0.63 | intronic   | ESC, ESDR,<br>IPSC | ESC, SKIN                                             |         |                                 | AP-1,Hdx,Irf,Pou3f2,TATA,TCF12 PU.1,TCF4        |
| rs3130501        | 6 | 31168676 | 0.82 | A | G   | 0.63 | intronic   | ESC, ESDR,<br>IPSC | ESDR, BLD,<br>SKIN, CRVX                              | ESC     |                                 | E2F,ERalpha-a,NRSF                              |
| rs3130502        | 6 | 31168889 | 0.83 | A | G   | 0.63 | intronic   | ESC, ESDR,<br>IPSC | ESDR, SKIN,<br>ADRL, PLCNT,<br>CRVX                   |         |                                 | SIX5                                            |
| rs3132524        | 6 | 31168937 | 0.83 | T | C   | 0.63 | intronic   | ESC, ESDR,<br>IPSC | ESDR, SKIN,<br>ADRL, PLCNT,<br>CRVX                   | ESC     |                                 | Bcl6b,GATA,HDAC2,RXRA,TAL1                      |
| rs3132523        | 6 | 31169055 | 0.83 | T | C   | 0.63 | intronic   | ESC, ESDR,<br>IPSC | ESDR, SKIN,<br>PLCNT, CRVX,<br>BLD                    |         |                                 | ERalpha-a,SETDB1                                |
| rs3132522        | 6 | 31169982 | 0.82 | T | C   | 0.64 | intronic   | ESC, ESDR,<br>IPSC | ESDR, BRST,<br>SKIN, GI,<br>PLCNT, SPLN,<br>CRVX, BLD |         | POL2,POL24H8,AP2ALPHA,AP2 GAMMA |                                                 |
| rs3094192        | 6 | 31170027 | 0.82 | C | G   | 0.64 | intronic   | ESC, ESDR,<br>IPSC | ESDR, BRST,<br>SKIN, GI,<br>PLCNT, SPLN,<br>CRVX, BLD |         | POL2,POL24H8,AP2GAMMA           | BCL,E2A,GR,Irf,LBP-9,Nkx2,PU.1 ,Pax-5,RXRA,STAT |
| rs3130504        | 6 | 31170060 | 0.82 | A | T   | 0.64 | intronic   | ESC, ESDR,<br>IPSC | ESDR, BRST,<br>SKIN, GI,<br>PLCNT, SPLN,<br>CRVX, BLD |         | POL2,POL24H8,AP2GAMMA           | SMC3,YY1                                        |
